# Supplementary material for: Transmission dynamics of and insights from the 2018–2019 measles outbreak in New York City: A modeling study
Source: PubMed Central journal article supplement — Sci Adv. 2020 May 27;6(22):eaaz4037. doi: 10.1126/sciadv.aaz4037 (PMC7272232; doi:10.1126/sciadv.aaz4037), 2020-05-27
Supplement: aaz4037_SM.pdf [file aaz4037_SM.pdf]

## Supplementary Materials for

### **Transmission dynamics of and insights from the 2018–2019 measles outbreak in New York City: A modeling study**

Wan Yang\*

\*Corresponding author. Email: [wy2202@columbia.edu](mailto:wy2202@columbia.edu)

Published 27 May 2020, *Sci. Adv.* **6**, eaaz4037 (2020)  
DOI: [10.1126/sciadv.aaz4037](https://doi.org/10.1126/sciadv.aaz4037)

#### **This PDF file includes:**

Tables S1 to S3  
Figs. S1 and S2  
References

**Table S1.** Comparison of model estimates on initial susceptibility and model performance under different assumptions on vaccination campaigns. The baseline setting is as reported in the main text and alternative settings 1 to 3 are as described in the section "*Sensitivity analysis on vaccination campaigns settings.*" The results are summarized by pooling all 10 model-inference runs (10,000 particles each run and 100,000 model realizations in total). The numbers are the mean and, for the susceptibilities, 95% credible intervals in the parentheses. The initial susceptibilities, estimated at the end of Sep 2018, were computed by adding the total numbers of individuals immunized by the vaccination campaigns in Oct 2018 to the posterior estimates at the end of Oct 2018.

|                                                           |             | Model Settings on Vaccination Campaigns |                   |                   |                   |
|-----------------------------------------------------------|-------------|-----------------------------------------|-------------------|-------------------|-------------------|
|                                                           | Age group   | Baseline                                | Alternative 1     | Alternative 2     | Alternative 3     |
| Estimated initial susceptibility (%) at end of Sep 2018   | <1 year     | 53.2 (49, 57.5)                         | 54.2 (50, 58.4)   | 54.2 (50, 58.5)   | 54.2 (50, 58.5)   |
|                                                           | 1-4 years   | 24.9 (20.4, 29.7)                       | 24.9 (20.4, 29.7) | 24.9 (20.4, 29.7) | 29.9 (25.4, 34.7) |
|                                                           | 5-17 years  | 6.0 (4.1, 7.9)                          | 7.5 (5.1, 9.9)    | 7.5 (5.1, 9.9)    | 6.0 (4.1, 7.9)    |
|                                                           | 18-49 years | 6.0 (4.1, 7.9)                          | 7.5 (5.2, 9.9)    | 7.5 (5.2, 9.9)    | 7.5 (5.2, 9.9)    |
|                                                           | 50+ years   | 6.0 (4.1, 7.9)                          | 6.0 (4.1, 7.9)    | 6.0 (4.1, 7.9)    | 6.0 (4.1, 7.9)    |
| Log-likelihood                                            |             | -255.25                                 | -265.52           | -255.25           | -257.42           |
| Relative error of total number of cases over the outbreak | <1 year     | 0.39%                                   | -11.96%           | -11.56%           | -17.91%           |
|                                                           | 1-4 years   | -0.04%                                  | -7.80%            | -6.90%            | -8.07%            |
|                                                           | 5-17 years  | -4.13%                                  | 14.38%            | 0.33%             | 1.84%             |
|                                                           | 18+ years   | -4.70%                                  | 7.24%             | 5.97%             | 7.95%             |
|                                                           | All ages    | -1.79%                                  | -0.65%            | -3.48%            | -4.25%            |
| Root-mean-square-error (RMSE), over Oct 2018 – July 2019  | <1 year     | 1.74                                    | 1.86              | 1.80              | 2.55              |
|                                                           | 1-4 years   | 8.72                                    | 8.13              | 8.17              | 7.70              |
|                                                           | 5-17 years  | 3.91                                    | 5.27              | 3.00              | 5.10              |
|                                                           | 18+ years   | 5.08                                    | 4.62              | 4.30              | 4.25              |
|                                                           | All ages    | 7.31                                    | 7.52              | 5.88              | 6.29              |
| Correlation, over Oct 2018 – July 2019                    | <1 year     | 0.99                                    | 1.00              | 1.00              | 0.99              |
|                                                           | 1-4 years   | 0.95                                    | 0.96              | 0.96              | 0.97              |
|                                                           | 5-17 years  | 0.99                                    | 0.97              | 0.99              | 0.97              |
|                                                           | 18+ years   | 0.97                                    | 0.97              | 0.97              | 0.97              |
|                                                           | All ages    | 0.99                                    | 0.99              | 1.00              | 1.00              |
| 1-step-head prediction RMSE, over Oct 2018 – Mar 2019     | <1 year     | 4.37                                    | 4.46              | 4.40              | 4.60              |
|                                                           | 1-4 years   | 17.13                                   | 17.34             | 17.35             | 25.12             |
|                                                           | 5-17 years  | 8.27                                    | 8.39              | 8.37              | 8.50              |
|                                                           | 18+ years   | 4.34                                    | 4.93              | 4.93              | 5.06              |
|                                                           | All ages    | 27.79                                   | 28.23             | 28.16             | 35.02             |

**Table S2.** Estimated negative impact of “measles parties” and positive impact of vaccination campaigns during Oct 2018 – July 2019. Column 2 shows the observed numbers of cases, reported as of Aug 6, 2019. Column 3 shows the estimated numbers of cases if there had been no “measles parties”. Columns 4-6 show the estimated total numbers of cases (4th column), hospitalizations (5th column), and individuals in intensive care unit (ICU) for different age groups (rows 3 to 6) and overall (last row), if there had been no vaccination campaigns. Columns 7-9 show the estimated numbers of cases, hospitalizations, and ICU cases averted by the vaccination campaigns. Numbers are the median (and 95% confidence intervals) of 10,000 simulations. See Table 2 in the main text for the median and interquartile ranges.

| Age group | No. cases reported | No. cases, if no measles parties | No. if no vaccination campaigns |                  |              | No. averted by vaccination campaigns |                  |              |
|-----------|--------------------|----------------------------------|---------------------------------|------------------|--------------|--------------------------------------|------------------|--------------|
|           |                    |                                  | Cases                           | Hospitalizations | ICU cases    | Cases                                | Hospitalizations | ICU cases    |
| <1        | 100                | 26 (0, 204)                      | 1302 (0, 1430)                  | 97 (0, 106)      | 20 (0, 22)   | 1202 (0, 1330)                       | 89 (0, 99)       | 18 (0, 20)   |
| 1-4       | 275                | 62 (3, 472)                      | 3914 (3, 4096)                  | 291 (0, 305)     | 60 (0, 63)   | 3639 (0, 3821)                       | 271 (0, 284)     | 56 (0, 59)   |
| 5-17      | 138                | 26 (1, 336)                      | 1412 (1, 1692)                  | 105 (0, 126)     | 22 (0, 26)   | 1274 (0, 1554)                       | 95 (0, 116)      | 20 (0, 24)   |
| 18+       | 129                | 29 (1, 272)                      | 1141 (1, 1343)                  | 85 (0, 100)      | 18 (0, 21)   | 1012 (0, 1214)                       | 75 (0, 90)       | 16 (0, 19)   |
| All       | 642                | 152 (5, 1246)                    | 7810 (5, 8443)                  | 581 (0, 628)     | 120 (0, 130) | 7168 (0, 7801)                       | 533 (0, 580)     | 110 (0, 120) |

**Table S3.** Main model parameters and prior ranges tested. In total, we tested 5040 combinations of prior ranges. Each combination was used as the lower and upper bounds of Latin Hypercube sampling. The optimal prior ranges used in the final model-inference runs are bolded if multiple ranges were tested.

| Parameter                                        | Symbol/Equation    | Ranges tested                                                                               | Source/rationale                                                        |
|--------------------------------------------------|--------------------|---------------------------------------------------------------------------------------------|-------------------------------------------------------------------------|
| Initial susceptibility in <1 year-olds           | $S_1(t=0)$ ; Eqn 1 | Based on susceptibility in 18-49 year-olds (i.e., the mothers)                              | N/A                                                                     |
| Initial susceptibility in 1-4 year-olds          | $S_2(t=0)$ ; Eqn 1 | [5, 15], [10, 20], [15, 25], [ <b>20, 30</b> ], [25, 35], [30, 40], [35, 45]% of population | Unclear; use a wide range                                               |
| Initial susceptibility in 5-17 year-olds         | $S_3(t=0)$ ; Eqn 1 | [ <b>4, 8</b> ], [5, 10], [5, 15], [10, 20], [15, 25]% of population                        | Unclear; use a wide range                                               |
| Initial susceptibility in 18-49 year-olds        | $S_4(t=0)$ ; Eqn 1 | [ <b>4, 8</b> ], [5, 10], [5, 15], [10, 20]% of population                                  | Higher vaccination rate for this age group (see data from the WHO (37)) |
| Initial susceptibility in 50+ year-olds          | $S_5(t=0)$ ; Eqn 1 | [4, 8]% of population                                                                       | High immunity due to natural infection in this group                    |
| Initial number of infants with maternal immunity | $M(t=0)$ ; Eqn 1   | Based on susceptibility in 18-49 year-olds (i.e., the mothers)                              | N/A                                                                     |
| Latent period                                    | $Z$ ; Eqn 1        | [7, 9] days                                                                                 | Mean = 8 days in (38)                                                   |
| Infectious period                                | $D$ ; Eqn 1        | [2, 6] days                                                                                 | 4-6 days in (26)                                                        |
| Mixing parameter for the susceptibles            | $m_1$ ; Eqn 1      | <b>1</b> (perfect mixing), [0.95, 1], [0.9, 0.95]                                           | 1 for well-mixed models                                                 |
| Mixing parameter for the infectious              | $m_2$ ; Eqn 1      | <b>1</b> (perfect mixing), [0.95, 1], [0.9, 0.95]                                           | 1 for well-mixed models and 0.97 estimated in (29)                      |
| Relative contact rate among <1 year-olds         | $\beta_1$ ; Eqn 2  | Set to 1                                                                                    | N/A                                                                     |
| Relative contact rate among 1-4 year-olds        | $\beta_2$ ; Eqn 2  | [3, 30]                                                                                     | Unclear; use a wide range                                               |
| Relative contact rate among 5-17 year-olds       | $\beta_3$ ; Eqn 2  | [25, 50]                                                                                    | 1.3-1.9 times of 0-4 year-olds (39)                                     |
| Relative contact rate among 18-49 year-olds      | $\beta_4$ ; Eqn 2  | [20, 40]                                                                                    | 1.3-1.6 times of 0-4 year-olds (39)                                     |
| Relative contact rate among 50+ year-olds        | $\beta_5$ ; Eqn 2  | [1, 5]                                                                                      | .7-1.4 times on 0-4 year-olds (39)                                      |
| Relative contact rate between 1-4 and 5-17       | $\beta_6$ ; Eqn 2  | [1, 5]                                                                                      | Unclear; use a wide range                                               |

---

|                                                                                  |                   |                                 |                                                                |
|----------------------------------------------------------------------------------|-------------------|---------------------------------|----------------------------------------------------------------|
| year-olds (sibling interactions)                                                 |                   |                                 |                                                                |
| Contact rate between 18-49 and 1-4 or 5-17 year-olds (parent-child interactions) | $\beta_7$ ; Eqn 2 | [1, 5]                          | Unclear; use a wide range                                      |
| Amplitude of school term-time forcing                                            | $b_I$ ; Eqn 3     | [0.25, 0.75], [ <b>0.5, 1</b> ] | Possible between 0-1.                                          |
| Basic reproductive number                                                        | $R_0$ ; Eqn 4     | <b>[5, 10]</b> , [7, 12]        | Common range: 12-18; possible values: 1.4-770 (6)              |
| Reporting rate                                                                   | $r$ ; Eqn 6       | [80, 100]%                      | Probably high as a later version of case report was used here. |

---

**Fig. S1.** Estimates of model parameters not listed in Fig. 4. (A) amplitude of school term-time forcing, (B) latent period, (C) reporting rate, (D) relative contact rate among 50+ year-olds, (E) relative contact rate between 1-4 and 5-17 year-olds (i.e. sibling interactions), and (F) relative contact rate between 18-49 and 1-4 or 5-17 year-olds (i.e. parent-child interactions). Red lines and surrounding regions (y-axis on the left) show the mean and 50% and 95% credible intervals of estimates pooled over all 10 model-inference runs (100,000 model realizations in total) made at the end of each month from Oct 2018 to July 2019. For comparison, the grey bars (y-axis on the right) show monthly incidence for all ages. Note that  $m_1$  and  $m_2$  are not shown as both optimal priors are the value 1 (Table S3).

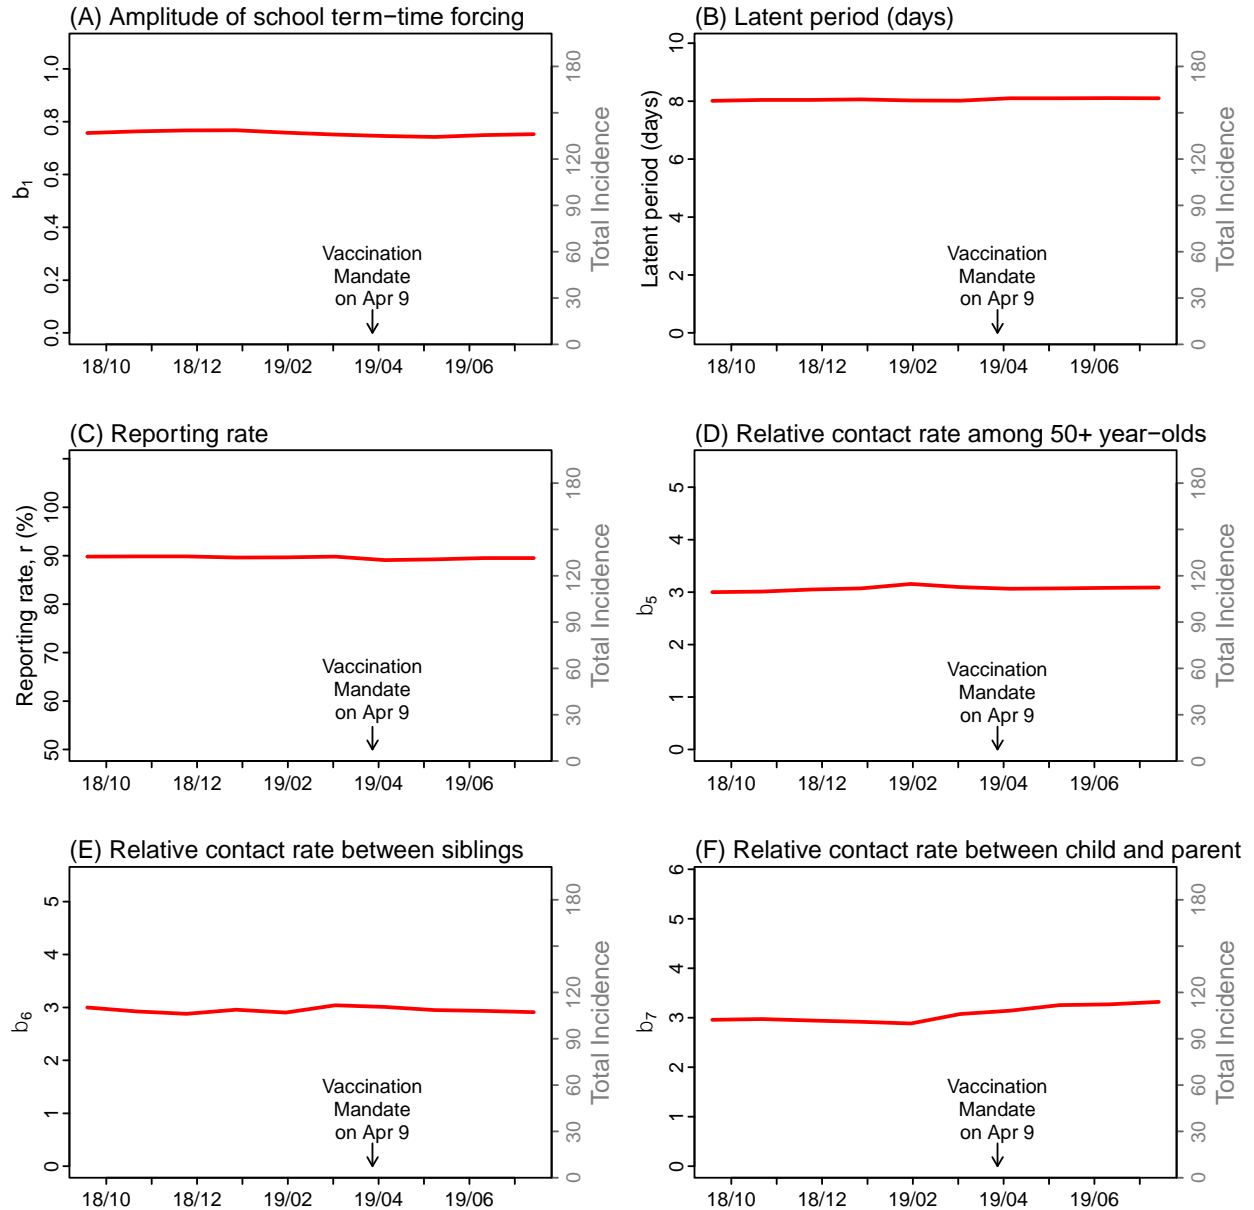

**Fig. S2.** Schematic of the measles transmission model. Measles transmission model follows the susceptible (S), exposed (E) and latently infected, infectious (I), and recovered/removed via vaccination (R) SEIR dynamics and includes 5 age-groups as indicated by the subscripts (i.e., <1, 1-4, 5-17, 18-49, and 50+ year-olds, respectively) and a group (M) for infants with maternal immunity. Black solid arrows show the disease-related processes; grey solid arrows show the demographic processes including birth (horizontal), aging (vertical), and death (tilted). Black dashed arrows show processes related to the routine 2-dose measles vaccination where susceptible individuals are vaccinated at ages 1 and 5 and move to the respective immune groups. Red dotted arrows show processes related to vaccination of susceptible individuals under 18 during the vaccination campaigns.

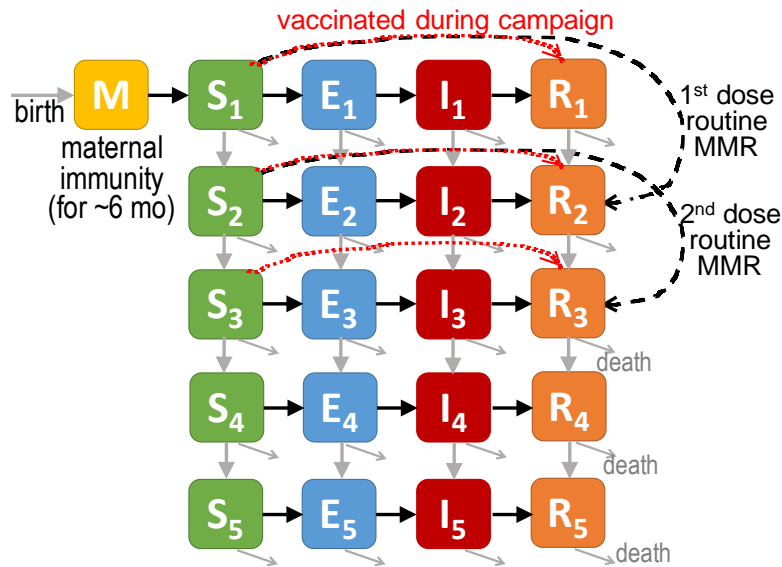

## REFERENCES AND NOTES

1. V. K. Phadke, R. A. Bednarczyk, D. A. Salmon, S. B. Omer, Association between vaccine refusal and vaccine-preventable diseases in the United States: A review of measles and pertussis. *JAMA* **315**, 1149–1158 (2016).
2. New York City Department of Health and Mental Hygiene, *ALERT # 39: Update on Measles Outbreak in New York City in the Orthodox Jewish Community* (2018); <https://www1.nyc.gov/assets/doh/downloads/pdf/han/alert/2018/alert39-measles-outbreak.pdf>
3. New York City Department of Health and Mental Hygiene, *Measles*, (July 29, 2019); <https://www1.nyc.gov/site/doh/health/health-topics/measles.page>
4. New York City Department of Health and Mental Hygiene, *Order of the Commissioner*; <https://www1.nyc.gov/assets/doh/downloads/pdf/press/2019/emergency-orders-measles.pdf>
5. New York City Department of Health and Mental Hygiene, Health Alert Network. <https://www1.nyc.gov/site/doh/providers/resources/health-alert-network.page>
6. F. M. Guerra, S. Bolotin, G. Lim, J. Heffernan, S. L. Deeks, Y. Li, N. S. Crowcroft, The basic reproduction number ( $R_0$ ) of measles: A systematic review. *Lancet Infect. Dis.* **17**, e420–e428 (2017).
7. S. Scutti, *New York City Declares a Public Health Emergency Amid Brooklyn Measles Outbreak*; <https://www.cnn.com/2019/04/09/health/measles-new-york-emergency-bn/index.html>
8. New York City Department of Health and Mental Hygiene, *ALERT # 9: Citywide Recommendations during the Ongoing Measles Outbreak in New York City*; <https://www1.nyc.gov/assets/doh/downloads/pdf/han/alert/2019/recommendations-during-measles-outbreak.pdf>
9. M. J. Mina, B. T. Grenfell, C. J. E. Metcalf, Response to Comment on “Long-term measles-induced immunomodulation increases overall childhood infectious disease mortality”. *Science* **365**, aax6498 (2019).
10. M. J. Mina, C. J. E. Metcalf, R. L. de Swart, A. D. M. E. Osterhaus, B. T. Grenfell, Long-term measles-induced immunomodulation increases overall childhood infectious disease mortality. *Science* **348**, 694–699 (2015).
11. P. A. Gastañaduy, S. Funk, P. Paul, L. Tatham, N. Fisher, J. Budd, B. Fowler, S. de Fijter, M. DiOrio, G. S. Wallace, B. Grenfell, Impact of public health responses during a measles outbreak



in an Amish community in Ohio: Modeling the dynamics of transmission. *Am. J. Epidemiol.* **187**, 2002–2010 (2018).

12. New York City Department of Health and Mental Hygiene, *ALERT # 2: Update on Measles Outbreak in New York City in the Orthodox Jewish Community*;

<https://www1.nyc.gov/assets/doh/downloads/pdf/han/alert/2019/update-on-measles-outbreak-in-nyc-in-the-orthodox-jewish-community.pdf>

13. J. B. Rosen, R. J. Arciuolo, A. M. Khawja, J. Fu, F. R. Giancotti, J. R. Zucker, Public health consequences of a 2013 measles outbreak in New York city. *JAMA Pediatr.* **172**, 811–817 (2018).

14. New York City Department of Health and Mental Hygiene, *ALERT # 38: Measles Outbreak in New York City in the Orthodox Jewish Community*;

<https://www1.nyc.gov/assets/doh/downloads/pdf/han/alert/2018/alert38-measles-outbreak.pdf>

15. P. A. Gastanaduy, E. Banerjee, C. DeBolt, P. Bravo-Alcantara, S. A. Samad, D. Pastor, P. A. Rota, M. Patel, N. S. Crowcroft, D. N. Durrheim, Public health responses during measles outbreaks in elimination settings: Strategies and challenges. *Hum. Vaccin. Immunother.* **14**, 2222–2238 (2018).

16. Centers for Disease Control and Prevention, *Chickenpox (Varicella): Transmission*;

<https://www.cdc.gov/chickenpox/about/transmission.html>

17. World Health Organization, Measles vaccines: WHO position paper, April 2017–Recommendations. *Vaccine* **37**, 219–222 (2017).

18. J. Lessler, C. J. E. Metcalf, F. T. Cutts, B. T. Grenfell, Impact on epidemic measles of vaccination campaigns triggered by disease outbreaks or serosurveys: A modeling study. *PLOS Med.* **13**, e1002144 (2016).

19. P. E. Christensen, H. Schmidt, H. O. Bang, V. Andersen, B. Jordal, O. Jensen, An epidemic of measles in Southern Greenland, 1951; measles in virgin soil. III. Measles and tuberculosis. *Acta Med. Scand.* **144**, 450–454 (1953).

20. P. E. Christensen, H. Schmidt, H. O. Bang, V. Andersen, B. Jordal, O. Jensen, An epidemic of measles in Southern Greenland, 1951; measles in virgin soil. II. The epidemic proper. *Acta Med. Scand.* **144**, 430–449 (1953).

21. S. Y. Chen, S. Anderson, P. K. Kutty, F. Lugo, M. McDonald, P. A. Rota, I. R. Ortega-Sanchez, K. Komatsu, G. L. Armstrong, R. Sunenshine, J. F. Seward, Health care–associated

- measles outbreak in the united states after an importation: Challenges and economic impact. *J. Infect. Dis.* **203**, 1517–1525 (2011).
22. G. H. Dayan, I. R. Ortega-Sánchez, C. W. LeBaron, M. P. Quinlisk, I. M. R. Team, The cost of containing one case of measles: The economic impact on the public health infrastructure—Iowa, 2004. *Pediatrics* **116**, E1–E4 (2005).
23. T. Pager, *Measles Outbreak: Yeshiva's Preschool Program Is Closed by New York City Health Officials*; <https://www.nytimes.com/2019/04/15/nyregion/measles-nyc-yeshiva-closing.html>
24. A. Sanders, *NYC Health Officials Close Two More Williamsburg Yeshivas for Failure to Show Immunization Records Amid Measles Outbreak*; <https://www.nydailynews.com/news/politics/ny-city-closes-williamsburg-brooklyn-yeshivas-measles-outbreak-20190613-jogozcbe65ejtalweq2551wkka-story.html>
25. R. M. Anderson, R. M. May, *Infectious Diseases of Humans: Dynamics and Control* (Oxford Univ. Press, Oxford, 1991).
26. M. J. Keeling, B. T. Grenfell, Disease extinction and community size: Modeling the persistence of measles. *Science* **275**, 65–67 (1997).
27. P. Beck, S. M. Cohen, J. B. Ukeles, R. Miller, *Jewish Community Study of New York: 2011, Geographic Profile* (New York City: UJA-Federation of New York, 2013).
28. W. Yang, J. Li, J. Shaman, Characteristics of measles epidemics in China (1951-2004) and implications for elimination: A case study of three key locations. *PLoS Comput. Biol.* **15**, e1006806 (2019).
29. B. F. Finkenstädt, B. T. Grenfell, Time series modelling of childhood diseases: A dynamical systems approach. *J. R. Stat. Soc. Ser. C. Appl. Stat.* **49**, 187–205 (2000).
30. W.-m. Liu, H. W. Hethcote, S. A. Levin, Dynamical behavior of epidemiological models with nonlinear incidence rates. *J. Math. Biol.* **25**, 359–380 (1987).
31. M. J. Keeling, P. Rohani, *Modeling Infectious Diseases in Humans and Animals* (Princeton Univ. Press, 2008), chap. 5, pp. 155–189.
32. New York City Department of Health and Mental Hygiene, *Health Department Reports Eleven New Cases of Measles in Brooklyn's Orthodox Jewish Community, Urges On Time Vaccination for All Children, Especially Before Traveling to Israel and Other countries*

*Experiencing Measles Outbreaks*; <https://www1.nyc.gov/site/doh/about/press/pr2018/pr091-18.page>

33. New York City Department of Health and Mental Hygiene, *Measles Outbreak in Orthodox Jewish Community of Brooklyn Continues to Grow—Health Department Urges Parents to Vaccinate Their Children*; <https://www1.nyc.gov/site/doh/about/press/pr2019/measles-outbreak-now-at-121-cases.page>

34. M. S. Arulampalam, S. Maskell, N. Gordon, T. Clapp, A tutorial on particle filters for online nonlinear/non-Gaussian Bayesian tracking. *IEEE Trans. Signal Process.* **50**, 174–188 (2002).

35. M. D. McKay, R. J. Beckman, W. J. Conover, A comparison of three methods for selecting values of input variables in the analysis of output from a computer code. *Technometrics* **21**, 239–245 (1979).

36. W. Yang, A. Karspeck, J. Shaman, Comparison of filtering methods for the modeling and retrospective forecasting of influenza epidemics. *PLoS Comput. Biol.* **10**, e1003583 (2014).

37. World Health Organization, *Global Health Observatory Data Repository – Immunization*; <http://apps.who.int/gho/data/node.main.A824?lang=en>

38. M. J. Keeling, B. T. Grenfell, Understanding the persistence of measles: Reconciling theory, simulation and observation. *Proc. Biol. Sci.* **269**, 335–343 (2002).

39. J. Mossong, N. Hens, M. Jit, P. Beutels, K. Auranen, R. Mikolajczyk, M. Massari, S. Salmaso, G. S. Tomba, J. Wallinga, J. Heijne, M. Sadkoawska-Todys, M. Rosinska, W. J. Edmunds, Social contacts and mixing patterns relevant to the spread of infectious diseases. *PLOS Med.* **5**, e74 (2008).
